# Supplementary material
Source: ML conference proceedings conference paper supplement (https://proceedings.neurips.cc/paper_files/paper/2021/hash/6c2e49911b68d315555d5b3eb0dd45bf-Abstract.html)
Supplement: Supplementary file 1 [file 6c2e49911b68d315555d5b3eb0dd45bf-Supplemental.pdf]

## A Regularizing Optimal Transport with $f$ -Divergences

| Name              | $f(v)$                                    | $f^*(v)$                 | $f^{*'}$                                 | $\text{Dom}(f^*(v))$ |
|-------------------|-------------------------------------------|--------------------------|------------------------------------------|----------------------|
| Kullback-Leibler  | $v \log(v)$                               | $\exp(v - 1)$            | $\exp(v - 1)$                            | $v \in \mathbb{R}$   |
| Reverse KL        | $-\log(v)$                                | $\log(-\frac{1}{v}) - 1$ | $-\frac{1}{v}$                           | $v < 0$              |
| Pearson $\chi^2$  | $(v - 1)^2$                               | $\frac{v^2}{4} + v$      | $\frac{v}{2} + 1$                        | $v \in \mathbb{R}$   |
| Squared Hellinger | $(\sqrt{v} - 1)^2$                        | $\frac{v}{1-v}$          | $(1 - v)^{-2}$                           | $v < 1$              |
| Jensen-Shannon    | $-(v + 1) \log(\frac{1+v}{2}) + v \log v$ | $\frac{e^x}{2 - e^x}$    | $\frac{2x}{e^x - 2} + x - \log(2 - e^x)$ | $v < \log(2)$        |
| GAN               | $v \log(v) - (v + 1) \log(v + 1)$         | $-v - \log(e^{-v} - 1)$  | $(e^{-v} - 1)^{-1}$                      | $v < 0$              |

Table 3: A list of  $f$ -Divergences, their Fenchel-Legendre conjugates, and the derivative of their conjugates. These functions determine the corresponding dual regularizers  $H_f^*(v)$  and compatibility functions  $M_f(v)$ . We take definitions of each divergence from [21]. Note that there are many equivalent formulations as each  $f(v)$  is defined only up to additive  $c(v - 1)$ ,  $c \in \mathbb{R}$ , and the resulting optimization problems are defined only up to shifting and scaling the objective.

Here are some general properties of  $f$ -Divergences which are also used in Section B. We provide examples of  $f$ -Divergences in Table 3. The specific forms of  $H_f^*(v)$  and  $M_f(v)$  are determined by  $f(v)$ ,  $f^*(v)$ , and  $f^{*'}(v)$ , which can in turn be used to formulate Algorithms 1 and 2 for each divergence.

**Definition A.1** ( $f$ -Divergences). Let  $f : \mathbb{R} \rightarrow \mathbb{R}$  be convex with  $f(1) = 0$  and let  $p, q$  be probability measures such that  $p$  is absolutely continuous with respect to  $q$ . The corresponding  $f$ -Divergence is defined  $D_f(p||q) = \mathbb{E}_q[f(\frac{dp(x)}{dq(x)})]$  where  $\frac{dp(x)}{dq(x)}$  is the Radon-Nikodym derivative of  $p$  w.r.t.  $q$ .

**Proposition A.2** (Strong Convexity of  $D_f$ ). Let  $\mathcal{X}$  be a countable compact metric space. Fix  $q \in \mathcal{M}_+(\mathcal{X})$  and let  $\mathcal{P}_q(\mathcal{X})$  be the set of probability measures on  $\mathcal{X}$  that are absolutely continuous with respect to  $q$  and which have bounded density over  $\mathcal{X}$ . Let  $f : \mathbb{R} \rightarrow \mathbb{R}$  be  $\alpha$ -strongly convex with corresponding  $f$ -Divergence  $D_f(p||q)$ . Then, the function  $H_f(p) := D_f(p||q)$  defined over  $p \in \mathcal{P}_q(\mathcal{X})$  is  $\alpha$ -strongly convex in 1-norm: for  $p_0, p_1 \in \mathcal{P}_q(\mathcal{X})$ ,

$$H_f(p_1) \geq H_f(p_0) + \langle \nabla_p H_f(p_0), p_1 - p_0 \rangle + \frac{\alpha}{2} |p_1 - p_0|_1^2. \quad (2)$$

*Proof.* Define the measure  $p_t = tp_1 + (1 - t)p_0$ . Then  $H_f$  satisfies the following convexity inequality (Melbourne [20], Proposition 2).

$$H_f(p_t) \leq tH_f(p_1) + (1 - t)H_f(p_0) - \alpha (t|p_1 - p_t|_{\text{TV}}^2 + (1 - t)|p_0 - p_t|_{\text{TV}}^2)$$

By assumption that  $\mathcal{X}$  is countable,  $|p - q|_{\text{TV}} = \frac{1}{2}|p - q|_1$ . It follows that,

$$\begin{aligned} H_f(p_1) &\geq H_f(p_0) + \frac{H_f(p_0 + t(p_1 - p_0)) - H_f(p_0)}{t} + \frac{\alpha}{2} (|p_1 - p_t|_1^2 + (t^{-1} - 1)|p_0 - p_t|_1^2) \\ &\geq H_f(p_0) + \frac{H_f(p_0 + t(p_1 - p_0)) - H_f(p_0)}{t} + \frac{\alpha}{2} |p_1 - p_t|_1^2 \end{aligned}$$

and, taking the limit  $t \rightarrow 0$ , the inequality (2) follows.  $\square$

For the purposes of solving empirical regularized optimal transport, the technical conditions of Proposition A.2 hold. Additionally, note that  $\alpha$ -strong convexity of  $f$  is sufficient but not necessary for strong convexity of  $H_f$ . For example, entropy regularization uses  $f_{\text{KL}}(v) = v \log(v)$  which is not strongly convex over its domain,  $\mathbb{R}_+$ , but which yields a regularizer  $H_{\text{KL}}(p) = \text{KL}(p||q)$  that is 1-strongly convex in  $l_1$  norm when  $q$  is uniform. This follows from Pinsker's inequality as shown in [22]. Also, if  $f$  is  $\alpha$ -strongly convex over a subinterval  $[a, b]$  of its domain, then Proposition A.2 holds under the additional assumption that  $a \leq \frac{dp(x)}{dq(x)}(x) \leq b$  uniformly over  $x \in \mathcal{X}$ .

## B Proofs

For convenience, we repeat the main assumptions and statements of theorems alongside their proofs. First, we prove the following properties about  $f$ -divergences.

**Proposition 2.4** – Regularization with  $f$ -Divergences. *Consider the empirical setting of Definition 2.1. Let  $f(v) : \mathbb{R} \rightarrow \mathbb{R}$  be a differentiable  $\alpha$ -strongly convex function with convex conjugate  $f^*(v)$ . Set  $f^{*'}(v) = \partial_v f^*(v)$ . Define the violation function  $V(x, y; \varphi, \psi) = \varphi(x) + \psi(y) - c(x, y)$ . Then,*

1. *The  $D_f$  regularized primal problem  $K_\lambda(\pi)$  is  $\lambda\alpha$ -strongly convex in  $l_1$  norm. With respect to dual variables  $\varphi \in \mathbb{R}^{|\mathcal{X}|}$  and  $\psi \in \mathbb{R}^{|\mathcal{Y}|}$ , the dual problem  $J_\lambda(\varphi, \psi)$  is concave, unconstrained, and  $\frac{1}{\lambda\alpha}$ -strongly smooth in  $l_\infty$  norm. Strong duality holds:  $K_\lambda(\pi) \geq J_\lambda(\varphi, \psi)$  for all  $\pi, \varphi, \psi$ , with equality for some triple  $\pi^*, \varphi^*, \psi^*$ .*
2.  *$J_\lambda(\varphi, \psi)$  takes the form*

$$J_\lambda(\varphi, \psi) = \mathbb{E}_\mu[\varphi(x)] + \mathbb{E}_\sigma[\psi(y)] - \mathbb{E}_{\mu \times \sigma}[H_f^*(V(x, y; \varphi, \psi))]$$

where  $H_f^*(v) = \lambda f^*(\lambda^{-1}v)$ .

3. *The optimal solutions  $(\pi^*, \varphi^*, \psi^*)$  satisfy*

$$\pi^*(x, y) = M_f(V(x, y; \varphi, \psi))\mu(x)\sigma(y)$$

where  $M_f(x, y) = f^{*'}(\lambda^{-1}v)$ .

*Proof.* By assumption that  $f$  is differentiable,  $K_\lambda(\pi)$  is continuous and differentiable with respect to  $\pi \in \mathcal{M}_+(\mathcal{X} \times \mathcal{Y})$ . By Proposition A.2 it is  $\lambda\alpha$ -strongly convex in  $l_1$  norm. By the Fenchel-Moreau theorem,  $K_\lambda(\pi)$  therefore has a unique minimizer  $\pi^*$  satisfying strong duality, and by [10, Theorem 6], the dual problem is  $\frac{1}{\lambda\alpha}$ -strongly smooth in  $l_\infty$  norm.

The primal and dual are related by the Lagrangian  $\mathcal{L}(\pi, \varphi, \psi)$ ,

$$\mathcal{L}(\varphi, \psi, \pi) = \mathbb{E}_\pi[c(x, y)] + \lambda H_f(\pi) + \mathbb{E}_\mu[\varphi(x)] - \mathbb{E}_\pi[\varphi(x)] + \mathbb{E}_\sigma[\varphi(y)] - \mathbb{E}_\pi[\psi(y)] \quad (3)$$

which has  $K_\lambda(\pi) = \max_{\varphi, \psi} \mathcal{L}(\varphi, \psi, \pi)$  and  $J_\lambda(\varphi, \psi) = \min_\pi \mathcal{L}(\varphi, \psi, \pi)$ . In the empirical setting,  $\pi, \mu, \sigma$  may be written as finite dimensional vectors with coordinates  $\pi_{x,y}, \mu_x, \sigma_y$  for  $x, y \in \mathcal{X} \times \mathcal{Y}$ . Minimizing the  $\pi$  terms of  $J_\lambda$ ,

$$\begin{aligned} \min_{\pi \in \mathcal{M}(\mathcal{X} \times \mathcal{Y})} & \left\{ \mathbb{E}_\pi[c(x, y) - \varphi(x) - \psi(y)] + \lambda \mathbb{E}_{\mu \times \sigma} \left[ f \left( \frac{d\pi(x, y)}{d\mu(x)d\sigma(y)} \right) \right] \right\} \\ &= \sum_{x, y \in \mathcal{X} \times \mathcal{Y}} - \max_{\pi_{x,y} \geq 0} \left\{ \pi_{x,y} \cdot (\varphi(x) + \psi(y) - c(x, y)) - \lambda \mu_x \sigma_y f \left( \frac{\pi_{x,y}}{\mu_x \sigma_y} \right) \right\} \\ &= \sum_{x, y \in \mathcal{X} \times \mathcal{Y}} -h_{x,y}^*(\varphi(x) + \psi(y) - c(x, y)) \end{aligned}$$

where  $h_{x,y}^*$  is the convex conjugate of  $(\lambda \mu_x \sigma_y) \cdot f(p/(\mu_x \sigma_y))$  w.r.t. the argument  $p$ . For general convex  $f(p)$ , it is true that  $[\lambda f(p)]^*(v) = \lambda f^*(\lambda^{-1}v)$  [3, Chapter 3]. Applying twice,

$$[(\lambda \mu_x \sigma_y) \cdot f(p/(\mu_x \sigma_y))]^*(v) = \lambda [(\mu_x \sigma_y) f(p/(\mu_x \sigma_y))]^*(\lambda^{-1}v) = (\lambda \mu_x \sigma_y) \cdot f^*(v/\lambda)$$

so that

$$\begin{aligned} \min_{\pi \in \mathcal{M}_+(\mathcal{X} \times \mathcal{Y})} & \mathbb{E}_\pi[c(x, y) - \varphi(x) - \psi(y)] + \lambda \mathbb{E}_{\mu \times \sigma} \left[ f \left( \frac{d\pi(x, y)}{d\mu(x)d\sigma(y)} \right) \right] \\ &= \sum_{x, y \in \mathcal{X} \times \mathcal{Y}} \mu_x \sigma_y \lambda f^*(\lambda^{-1}v) \\ &= -\mathbb{E}_{\mu \times \sigma}[H_f^*(V(x, y; \varphi, \psi))] \end{aligned}$$

for  $H_f^*(v) = \lambda f^*(\lambda^{-1}v)$ . The claimed form of  $J_\lambda(\varphi, \psi)$  follows.

Additionally, for general convex  $f(p)$ , it is true that  $\partial_v f^*(v) = \arg \max_p \{ \langle v, p \rangle - f(p) \}$ , [3, Chapter 3]. For  $\varphi^*, \psi^*$  maximizing  $J_\lambda(\varphi, \psi)$ , it follows by strong duality that

$$\begin{aligned}\pi_{x,y}^* &= \arg \min_{\pi \in \mathcal{M}_+(\mathcal{X} \times \mathcal{Y})} \mathcal{L}(\varphi^*, \psi^*, \pi) \\ &= \nabla_V \mathbb{E}_{\mu \times \sigma} [H_f^*(V(x, y; \varphi^*, \psi^*))] = M_f(V(x, y; \varphi^*, \psi^*)) \mu_x \sigma_y.\end{aligned}$$

as claimed.  $\square$

We proceed to proofs of the theorems stated in Section 4

**Assumption 4.1** – Approximate Linearity. *Let  $f_\theta(x)$  be a neural network and set  $\mathcal{K}_\theta(x) = [J_\theta^f(x)][J_\theta^f(x)]^T$  where  $J_\theta^f(x)$  is the Jacobian of  $f_\theta(x)$  with respect to  $\theta$ . Let  $\Theta$  be a set of feasible weights, for example those reachable by gradient descent. Then  $f_\theta(x)$  must satisfy,*

1. *There exists  $R \gg 0$  so that  $\Theta \subseteq B(0, R)$ , where  $B(0, R)$  is the Euclidean ball of radius  $R$ .*
2. *There exist  $\rho_M > \rho_m > 0$  such that for  $\theta \in \Theta$  and for all data points  $\{X_i\}_{i=1}^N$ ,*  

$$\rho_M \geq \lambda_{\max}(\mathcal{K}_\theta(X_i)) \geq \lambda_{\min}(\mathcal{K}_\theta(X_i)) \geq \rho_m > 0.$$
3. *For  $\theta \in \Theta$  and for all data points  $\{X_i\}_{i=1}^N$ , the Hessian matrix  $D_\theta^2 f_\theta(x_i)$  is bounded in spectral norm:*

$$\|D_\theta^2 f_\theta(x_i)\| \leq \frac{\rho_M}{C_h}$$

where  $C_h \gg 0$  depends only on  $R, N$ , and the regularization  $\lambda$ .

The constant  $C_h$  may depend on the dataset size  $N$ , the upper bound of  $\rho_M$  for eigenvalues of the NTK, the regularization parameter  $\lambda$ , and it may also depend indirectly on the bound  $R$ .

**Theorem 4.2** – Optimizing Neural Nets. *Suppose  $J_\lambda(\varphi, \psi)$  is  $\frac{1}{s}$ -strongly smooth in  $l_\infty$  norm. Let  $\varphi_\theta, \psi_\theta$  be neural networks satisfying Assumption 4.1 for the dataset  $\{(x_i, y_i)\}_{i=1}^N$ ,  $N = |\mathcal{X}| \cdot |\mathcal{Y}|$ . Then gradient descent of  $J_\lambda(\varphi_\theta, \psi_\theta)$  with respect to  $\theta$  at learning rate  $\eta = \frac{\lambda}{2\rho_M}$  converges to an  $\epsilon$ -approximate global maximizer of  $J_\lambda$  in at most  $\left(\frac{2\kappa R^2}{s}\right) \epsilon^{-1}$  iterations, where  $\kappa = \frac{\rho_M}{\rho_m}$ .*

*Proof.* For indices  $i$ , let  $S_{\theta_i} = (\varphi_{\theta_i}, \psi_{\theta_i})$  so that Assumption 4.1 applies with  $S_\theta$  in place of  $f_\theta$ .

**Lemma B.1** (Smoothness).  *$J_\lambda(S_\theta)$  is  $\frac{2\rho_M}{s}$ -strongly smooth in  $l_2$  norm with respect to  $\theta$ :*

$$J_\lambda(S_{\theta_2}) \leq J_\lambda(S_{\theta_1}) + \langle \nabla_\theta J_\lambda(S_{\theta_1}), S_{\theta_2} - S_{\theta_1} \rangle + \frac{\rho_M}{\lambda} \|\theta_2 - \theta_1\|_2^2.$$

*Proof.* It is assumed that  $J_\lambda(S)$  is  $(\frac{1}{s}, l_\infty)$ -strongly smooth and that  $K_\lambda(\pi)$  is  $(s, l_1)$ -strongly convex. Note that  $(\frac{1}{s}, l_2)$ -strong smoothness is weakest in the sense that it is implied via norm equivalence by  $(\frac{1}{s}, l_q)$ -strong smoothness for  $2 \leq q \leq \infty$ .

$$\begin{aligned}J_\lambda(S_2) &\leq J_\lambda(S_1) + \langle \nabla_S J_\lambda(S_1), S_2 - S_1 \rangle + \frac{1}{2s} \|S_2 - S_1\|_q^2 \\ \implies J_\lambda(S_2) &\leq J_\lambda(S_1) + \langle \nabla_S J_\lambda(S_1), S_2 - S_1 \rangle + \frac{1}{2s} \|S_2 - S_1\|_2^2\end{aligned}$$

A symmetric property holds for  $(s, l_2)$ -strong convexity of  $K_\lambda(\pi)$  which is implied by  $(s, l_p)$ -strong convexity,  $1 \leq p \leq 2$ . By Assumption 4.1

$$J_\lambda(S_{\theta_2}) - J_\lambda(S_{\theta_1}) - \langle \nabla_S J_\lambda(S_{\theta_1}), S_{\theta_2} - S_{\theta_1} \rangle \leq \frac{1}{2s} \|S_{\theta_2} - S_{\theta_1}\|_2^2 \leq \frac{\rho_M}{2s} \|\theta_2 - \theta_1\|_2^2. \quad (4)$$

To establish smoothness, it remains to bound  $\langle \nabla_S J_\lambda(S_{\theta_1}), S_{\theta_2} - S_{\theta_1} \rangle$ . Set  $v = \nabla_S J_\lambda(S_{\theta_1}) \in \mathbb{R}^n$  and consider the first-order Taylor expansion in  $\theta$  of  $\langle v, S_\theta \rangle$  evaluated at  $\theta = \theta_2$ . Applying Lagrange's form of the remainder, there exists  $0 < c < 1$  such that

$$\begin{aligned}\langle v, S_{\theta_2} \rangle &= \langle v, S_{\theta_1} \rangle + \langle v, J_\theta^S(S_{\theta_2} - S_{\theta_1}) \rangle \\ &\quad + \frac{1}{2} \sum_{i=1}^n v_i (\theta_2 - \theta_1)^T [D_\theta^2(S_{\theta_1}(x_i) + c(S_{\theta_2}(x_i) - S_{\theta_1}(x_i)))] (\theta_2 - \theta_1)\end{aligned}$$

and so by Cauchy-Schwartz,

$$\langle v, S_{\theta_2} - S_{\theta_1} \rangle \leq \langle v, J_{\theta}^S(S_{\theta_2} - S_{\theta_1}) \rangle + \frac{\|D_{\theta}^2\|}{2} \sqrt{N} \|v\|_2 \|\theta_2 - \theta_1\|_2^2 \leq \frac{\rho_M}{2s} \|\theta_2 - \theta_1\|_2^2.$$

The final inequality follows by taking  $C_h \geq \lambda \sqrt{N} \sup_v \|v\|_2$ . This supremum is bounded by assumption that  $\Theta \subseteq B(0, R)$ . Plugging in  $v = \nabla_S J_{\lambda}(S_{\theta_1})$ , we have

$$\begin{aligned} \langle \nabla_S J_{\lambda}(S_{\theta_1}), S_{\theta_2} - S_{\theta_1} \rangle &\leq \langle \nabla_S J_{\lambda}(S_{\theta_1}), J_{\theta}^S(S_{\theta_2} - S_{\theta_1}) \rangle + \frac{\rho_M}{2s} \|\theta_2 - \theta_1\|_2^2 \\ &= \langle \nabla_{\theta} J_{\lambda}(S_{\theta_1}), \theta_2 - \theta_1 \rangle + \frac{\rho_M}{2s} \|\theta_2 - \theta_1\|_2^2. \end{aligned}$$

Returning to (4), we have

$$J_{\lambda}(S_{\theta_2}) - J_{\lambda}(S_{\theta_1}) \leq \langle \nabla_{\theta} J_{\lambda}(S_{\theta_1}), \theta_2 - \theta_1 \rangle + \frac{\rho_M}{s} \|\theta_2 - \theta_1\|_2^2.$$

from which Lemma B.1 follows.  $\square$

**Lemma B.2** (Gradient Descent). *Gradient descent over the parameters  $\theta$  with learning rate  $\eta = \frac{s}{2\rho_M}$  converges in  $T$  iterations to parameters  $\theta_t$  satisfying  $J_{\lambda}(S_{\theta_t}) - J_{\lambda}(S^*) \leq \left(\frac{2\kappa R^2}{s}\right) \frac{1}{T}$  where  $\kappa = \frac{\rho_M}{\rho_m}$  is the condition number.*

*Proof.* Fix  $\theta_0$  and set  $\theta_{t+1} = \theta_t - \eta \nabla_{\theta} J_{\lambda}(S_{\theta_t})$ . The step size  $\eta$  is chosen so that by Lemma B.1  $J_{\lambda}(S_t) - J_{\lambda}(S_{t+1}) \geq \frac{s}{2\rho_M} \|\nabla_{\theta} J_{\lambda}(S_{\theta_t})\|_2^2$ .

By convexity,  $J_{\lambda}(S^*) \geq J_{\lambda}(S_{\theta_t}) + \langle \nabla_S J_{\lambda}(S_{\theta_t}), S^* - S_{\theta_t} \rangle$ , so that

$$\|\nabla_{\theta} J_{\lambda}(S_{\theta_t})\|_2^2 \geq \rho_m \|\nabla_S J_{\lambda}(S_{\theta_t})\|_2^2 \geq (J_{\lambda}(S_{\theta_t}) - J_{\lambda}(S^*))^2 \left( \frac{\rho_m}{\|S_{\theta_t} - S^*\|_2^2} \right).$$

Setting  $\Delta_t = J_{\lambda}(S_{\theta_t}) - J_{\lambda}(S^*)$ , this implies  $\Delta_t \geq \Delta_{t+1} + \Delta_t^2 \left( \frac{s\rho_m}{2\rho_M \|S_{\theta_t} - S^*\|_2^2} \right)$  and thus  $\Delta_t \leq \left[ T \left( \frac{s\rho_m}{2\rho_M \|S_{\theta_t} - S^*\|_2^2} \right) \right]^{-1}$ . The claim follows from  $\|S_{\theta_t} - S^*\|_2 < R$ .  $\square$

Theorem 4.2 follows immediately from Lemmas B.1 and B.2.  $\square$

**Theorem, 4.3** – Stability of Regularized OT Problem. *Suppose  $K_{\lambda}(\pi)$  is  $s$ -strongly convex in  $l_1$  norm and let  $\mathcal{L}(\varphi, \psi, \pi)$  be the Lagrangian of the regularized optimal transport problem. For  $\hat{\varphi}, \hat{\psi}$  which are  $\epsilon$ -approximate maximizers of  $J_{\lambda}(\varphi, \psi)$ , the pseudo-plan  $\hat{\pi} = M_f(V(x, y; \hat{\varphi}, \hat{\psi}))\mu(x)\sigma(y)$  satisfies*

$$|\hat{\pi} - \pi^*|_1 \leq \sqrt{\frac{2\epsilon}{s}} \leq \frac{1}{s} \left| \nabla_{\hat{\pi}} \mathcal{L}(\hat{\varphi}, \hat{\psi}, \hat{\pi}) \right|_1.$$

*Proof.* For indices  $i$ , denote by  $S_i$  the tuple  $(\varphi_i, \psi_i, \pi_i)$ . The regularized optimal transport problem has Lagrangian  $\mathcal{L}(\varphi, \psi, \pi)$  given by

$$\mathcal{L}(\varphi, \psi, \pi) = \mathbb{E}_{\pi}[c(x, y)] + \lambda H_f(\pi) + \mathbb{E}_{\mu}[\varphi(x)] - \mathbb{E}_{\pi}[\varphi(x)] + \mathbb{E}_{\sigma}[\psi(y)] - \mathbb{E}_{\pi}[\psi(y)]$$

Because  $\mathcal{L}(\varphi, \psi, \pi)$  is a sum of  $K_{\lambda}(\pi)$  and linear terms, the Lagrangian inherits  $s$ -strong convexity w.r.t. the argument  $\pi$ :

$$\mathcal{L}(S_2) \geq \mathcal{L}(S_1) + \langle \nabla \mathcal{L}(S_1), S_2 - S_1 \rangle + \frac{s}{2} |\pi_2 - \pi_1|_1^2.$$

Letting  $S^* = (\varphi^*, \psi^*, \pi^*)$  be the optimal solution and  $\hat{S} = (\hat{\varphi}, \hat{\psi}, \hat{\pi})$  be an  $\epsilon$ -approximation, it follows that

$$\epsilon \geq \mathcal{L}(\hat{S}) - \mathcal{L}(S^*) \geq \frac{s}{2} |\hat{\pi} - \pi^*|_1^2 \implies |\hat{\pi} - \pi^*|_1 \leq \sqrt{\frac{2\epsilon}{s}}. \quad (5)$$

Additionally, note that strong convexity implies a Polyak-Łojasiewicz (PL) inequality w.r.t.  $\hat{\pi}$ .

$$s \left( \mathcal{L}(\hat{S}) - \mathcal{L}(S^*) \right) \leq \frac{1}{2} |\nabla_{\pi} \mathcal{L}(\hat{S})|_1^2. \quad (6)$$

The second inequality follows from (5) and the PL inequality (6).  $\square$

## B.1 Statistical Estimation of Sinkhorn Plans

We consider estimating an entropy regularized OT plan when  $\mathcal{Y} = \mathcal{X}$ . Let  $\hat{\mu}, \hat{\sigma}$  be empirical distributions generated by drawing  $n \geq 1$  i.i.d. samples from  $\mu, \sigma$  respectively. Let  $\pi_n^\lambda$  be the Sinkhorn plan between  $\hat{\mu}$  and  $\hat{\sigma}$  at regularization  $\lambda$ , and let  $D := \text{diam}(\mathcal{X})$ . For simplicity, we also assume that  $\mu$  and  $\sigma$  are sub-Gaussian. We also assume that  $n$  is fixed. Under these assumptions, we will show that  $W_1(\pi_n^\lambda, \pi^\lambda) \lesssim n^{-1/2}$ .

The following result follows from Proposition E.4 and E.5 of Luise et al. [18] and will be useful in deriving the statistical error between  $\pi_n^\lambda$  and  $\pi^\lambda$ . This result characterizes fast statistical convergence of the Sinkhorn potentials as long as the cost is sufficiently smooth.

**Proposition B.3.** *Suppose that  $c \in \mathcal{C}^{s+1}(\mathcal{X} \times \mathcal{X})$ . Then, for any  $\mu, \sigma$  probability measures supported on  $\mathcal{X}$ , with probability at least  $1 - \tau$ ,*

$$\|v - v_n\|_\infty, \|u - u_n\|_\infty \lesssim \frac{\lambda e^{3D/\lambda} \log 1/\tau}{\sqrt{n}},$$

where  $(u, v)$  are the Sinkhorn potentials for  $\mu, \sigma$  and  $(u_n, v_n)$  are the Sinkhorn potentials for  $\hat{\mu}, \hat{\sigma}$ .

Let  $\pi_n^\lambda = M_n \mu_n \sigma_n$  and  $\pi^\lambda = M \mu \sigma$ . We recall that

$$M(x, y) = \frac{1}{e} \exp \left( \frac{1}{\lambda} (\varphi(x) + \psi(y) - c(x, y)) \right),$$

$$M_n(x, y) = \frac{1}{e} \exp \left( \frac{1}{\lambda} (\varphi_n(x) + \psi_n(y) - c(x, y)) \right),$$

We note that  $M$  and  $M_n$  are uniformly bounded by  $e^{3D/\lambda}$  [18] and  $M$  inherits smoothness properties from  $\varphi, \psi$ , and  $c$ .

We can write (for some optimal, bounded, 1-Lipschitz  $f_n$ )

$$\begin{aligned} W_1(\pi_n^\lambda, \pi^\lambda) &= \left| \int f_n \pi_n^\lambda - \int f_n \pi^\lambda \right| \\ &\leq \left| \int f_n (H_n - H) \mu_n \sigma_n \right| + \left| \int f_n H (\mu_n \sigma_n - \mu \sigma) \right| \\ &\leq |f_n|_\infty |H_n - H|_\infty + \left| \int f_n H (\mu_n \sigma_n - \mu \sigma) \right|. \end{aligned} \quad (7)$$

If  $\mu$  and  $\sigma$  are  $\beta^2$  subGaussian, then we can bound the second term with high probability:

$$\mathbb{P} \left( \left| \frac{1}{n^2} \sum_i \sum_j f_n(X_i, Y_j) H(X_i, Y_j) - \mathbb{E}_{\mu \times \sigma} f_n(X, Y) H(X, Y) \right| > t \right) < e^{-n^2 \frac{t^2}{2\beta^2}}.$$

Setting  $t = \sqrt{2} \log(\delta) \beta / n$  in this expression, we get that w.p. at least  $1 - \delta$ ,

$$\left| \frac{1}{n^2} \sum_i \sum_j f_n(X_i, Y_j) H(X_i, Y_j) - \mathbb{E}_{\mu \times \sigma} f_n(X, Y) H(X, Y) \right| < \frac{\sqrt{2} \beta \log \delta}{n}.$$

Now to bound the first term in (7), we use the fact that  $f_n$  is 1-Lipschitz and bounded by  $D$ . For the optimal potentials  $\varphi$  and  $\psi$  in the original Sinkhorn problem for  $\mu$  and  $\sigma$ , we use the result of Proposition B.3 to yield

$$\begin{aligned} |H_n(x, y) - H(x, y)| &= \left| \frac{1}{e} \exp \left( \frac{1}{\lambda} (\varphi_n(x) + \psi_n(y) - c(x, y)) \right) - \frac{1}{e} \exp \left( \frac{1}{\lambda} (\varphi(x) + \psi(y) - c(x, y)) \right) \right| \\ &= \frac{1}{e} \left| \exp \left( \frac{1}{\lambda} (\varphi(x) + \psi(y) - c(x, y)) \right) \left( 1 - \exp \left( \frac{\varphi(x) - \varphi_n(x)}{\lambda} \right) \exp \left( \frac{\psi(y) - \psi_n(y)}{\lambda} \right) \right) \right| \\ &\lesssim e^{3D/\lambda} |1 - e^{\frac{2}{\lambda\sqrt{n}}}| \\ &\lesssim \frac{e^{3D/\lambda}}{\lambda\sqrt{n}}. \end{aligned}$$

Thus, putting this all together,

$$W_1(\pi_n^\lambda, \pi^\lambda) \lesssim \frac{D}{\sqrt{n}} + \frac{1}{n}.$$

Interestingly, the rate of estimation of the Sinkhorn plan breaks the curse of dimensionality. It must be noted, however, that the exponential dependence of Proposition B.3 on  $\lambda^{-1}$  implies we can only attain these fast rates in appropriately large regularization regimes.

## B.2 Log-concavity of Sinkhorn Factor

The optimal entropy regularized Sinkhorn plan is given by

$$\pi^*(x, y) = \frac{1}{e} \exp \left( \frac{1}{\lambda} (\varphi^*(x) + \psi^*(y) - c(x, y)) \right) \mu(x) \sigma(y).$$

This implies that the conditional Sinkhorn density of  $Y|X$  is

$$\pi^*(y|x) = \frac{1}{e} \exp \left( \frac{1}{\lambda} (\varphi^*(x) + \psi^*(y) - c(x, y)) \right) \sigma(y).$$

The optimal potentials satisfy fixed point equations. In particular,

$$\psi^*(y) = -\lambda \log \int \exp \left[ -\frac{1}{\lambda} (c(x, y) - \varphi^*(x)) \right] d\mu(x).$$

Using this result, one can prove the following lemma.

**Lemma B.4** ([1]). *For the cost  $\|x - y\|^2$ , the map*

$$h(y) = \exp \left( \frac{1}{\lambda} (\varphi^*(x) + \psi^*(y) - \|x - y\|^2) \right)$$

*is log-concave.*

*Proof.* The proof comes by differentiating the map. We calculate the gradient,

$$\nabla \log h(y) = -2 \frac{y - x}{\lambda} + \frac{2}{\lambda} \frac{\int \exp \left[ -\frac{1}{\lambda} (\|x - y\|^2 - \varphi^*(x)) \right] (y - x) d\mu(x)}{\int \exp \left[ -\frac{1}{\lambda} (\|x - y\|^2 - \varphi^*(x)) \right] d\mu(x)}$$

and the Hessian,

$$\begin{aligned} \nabla^2 \log h(y) &= -2 \frac{I}{\lambda} \\ &+ \frac{4}{\lambda^2} \frac{\int \exp \left[ -\frac{1}{\lambda} (\|x - y\|^2 - \varphi^*(x)) \right] (y - x) d\mu(x) \int \exp \left[ -\frac{1}{\lambda} (\|x - y\|^2 - \varphi^*(x)) \right] (y - x)^\top d\mu(x)}{\left( \int \exp \left[ -\frac{1}{\lambda} (\|x - y\|^2 - \varphi^*(x)) \right] d\mu(x) \right)^2} \\ &- \frac{4}{\lambda^2} \frac{\int \exp \left[ -\frac{1}{\lambda} (\|x - y\|^2 - \varphi^*(x)) \right] (y - x)(y - x)^\top d\mu(x)}{\int \exp \left[ -\frac{1}{\lambda} (\|x - y\|^2 - \varphi^*(x)) \right] d\mu(x)} \\ &+ 2I/\lambda \frac{\int \exp \left[ -\frac{1}{\lambda} (\|x - y\|^2 - \varphi^*(x)) \right] d\mu(x)}{\int \exp \left[ -\frac{1}{\lambda} (\|x - y\|^2 - \varphi^*(x)) \right] d\mu(x)} \\ &= -\frac{4}{\lambda^2} \left( -\frac{\int \exp \left[ -\frac{1}{\lambda} (\|x - y\|^2 - \varphi^*(x)) \right] (y - x) d\mu(x) \int \exp \left[ -\frac{1}{\lambda} (\|x - y\|^2 - \varphi^*(x)) \right] (y - x)^\top d\mu(x)}{\left( \int \exp \left[ -\frac{1}{\lambda} (\|x - y\|^2 - \varphi^*(x)) \right] d\mu(x) \right)^2} \right. \\ &\quad \left. + \frac{\int \exp \left[ -\frac{1}{\lambda} (\|x - y\|^2 - \varphi^*(x)) \right] (y - x)(y - x)^\top d\mu(x)}{\int \exp \left[ -\frac{1}{\lambda} (\|x - y\|^2 - \varphi^*(x)) \right] d\mu(x)} \right) \end{aligned}$$

In the last term, we recognize that

$$\rho(x) = \frac{\exp \left[ -\frac{1}{\lambda} (\|x - y\|^2 - \varphi^*(x)) \right]}{\int \exp \left[ -\frac{1}{\lambda} (\|x - y\|^2 - \varphi^*(x)) \right] d\mu(x)}$$

forms a valid density with respect to  $\mu$ , and thus

$$\nabla^2 \log h(y) = -\frac{4}{\lambda^2} \text{Cov}_{\rho d\mu}(X - y)$$

where we take the covariance matrix of  $X - y$  with respect to the density  $\rho d\mu$ .  $\square$

Suppose, for sake of argument, that  $\sigma(y)$  is  $\alpha$  strongly log-concave, and the function  $h(y)$  is  $\beta$  strongly log-concave. Then,  $\pi_{Y|X=x} \propto h(y)\sigma(y)$ ,  $\alpha + \beta$  strongly log-concave. In particular, standard results on the mixing time of the Langevin diffusion implies that the diffusion for  $\pi_{Y|X=x}$  mixes faster than the diffusion for the marginal  $\sigma$  alone. Also, as  $\lambda \rightarrow 0$ , the function  $h(y)$  concentrates around  $\varphi_{OT}(x) + \psi_{OT}(y) - \|x - y\|^2$ , where  $\varphi_{OT}$  and  $\psi_{OT}$  are the optimal transport potentials. In particular, if there exists an optimal transport map between  $\mu$  and  $\sigma$ , then  $h(y)$  concentrates around the unregularized optimal transport image  $y = T(x)$ .

## C Experimental Details

### C.1 Network Architectures

Our method integrates separate neural networks playing the roles of *unconditional score estimator*, *compatibility function*, and *barycentric projector*. In our experiments each of these networks uses one of two main architectures: a fully connected network with ReLU activations, and an image-to-image architecture introduced by Song and Ermon [24] that is inspired by architectures for image segmentation.

For the first network type, we write “ReLU FCN, Sigmoid output,  $w_0 \rightarrow w_1 \rightarrow \dots \rightarrow w_k \rightarrow w_{k+1}$ ,” for integers  $w_i \geq 1$ , to indicate a  $k$ -hidden-layer fully connected network whose internal layers use ReLU activations and whose output layer uses sigmoid activation. The hidden layers have dimension  $w_1, w_2, \dots, w_k$  and the network has input and output with dimension  $w_0, w_{k+1}$  respectively.

For the second network type, we replicate the architectures listed in Song and Ermon [24, Appendix B.1, Tables 2 and 3] and refer to them by name, for example “NCSN  $32^2$  px” or “NCSNv2  $32^2$  px.”

Our implementation of these experiments may be found in the supplementary code submission.

### C.2 Image Sampling Parameter Sheets

**MNIST  $\leftrightarrow$  USPS:** details for qualitative transportation experiments between MNIST and USPS in Figure 3 are given in Table 4.

**CelebA, Blur-CelebA  $\rightarrow$  CelebA:** we sample  $64^2$  px CelebA images. The Blur-CelebA dataset is composed of CelebA images which are first resized to  $32^2$  px and then resized back to  $64^2$  px, creating a blurred effect. The FID computations in Table ?? used a shared set of training parameters given in Table 5. The sampling parameters for each FID computation are given in Table 6.

**Synthetic Data:** details for the synthetic data experiment shown in Figure 2 are given in Table 7.

| Problem Aspect         | Hyperparameters             | Numbers and details                                                                                                                                                       |
|------------------------|-----------------------------|---------------------------------------------------------------------------------------------------------------------------------------------------------------------------|
| Source                 | Dataset                     | USPS [19]                                                                                                                                                                 |
|                        | Preprocessing               | None                                                                                                                                                                      |
| Target                 | Dataset                     | MNIST [13]                                                                                                                                                                |
|                        | Preprocessing               | Nearest neighbor resize to $16^2$ px.                                                                                                                                     |
| Score Estimator        | Architecture                | NCSN $32^2$ px, applied as-is to $16^2$ px images.                                                                                                                        |
|                        | Loss                        | Denoising Score Matching                                                                                                                                                  |
|                        | Optimization                | Adam, $\text{lr} = 10^{-4}$ , $\beta_1 = 0.9$ , $\beta_2 = 0.999$ .<br>No EMA of model parameters.                                                                        |
|                        | Training                    | 40000 training iterations,<br>128 samples per minibatch.                                                                                                                  |
| Compatibility          | Architecture                | ReLU network with ReLU output activation,<br>$256 \rightarrow 1024 \rightarrow 1024 \rightarrow 1$                                                                        |
|                        | Regularization              | $\chi^2$ Regularization, $\lambda = 0.001$ .                                                                                                                              |
|                        | Optimization                | Adam, $\text{lr} = 10^{-6}$ , $\beta_1 = 0.9$ , $\beta_2 = 0.999$                                                                                                         |
|                        | Training                    | 5000 training iterations,<br>1000 samples per minibatch.                                                                                                                  |
| Barycentric Projection | Architecture                | ReLU network with sigmoid output activation,<br>$256 \rightarrow 1024 \rightarrow 1024 \rightarrow 256$ .<br>Input pixels are scaled to $[-1, 1]$ by $x \mapsto 2x - 1$ . |
|                        | Optimization                | Adam, $\text{lr} = 10^{-6}$ , $\beta_1 = 0.9$ , $\beta_2 = 0.999$                                                                                                         |
|                        | Training                    | 5000 training iterations,<br>1000 samples per minibatch.                                                                                                                  |
| Sampling               | Annealing Schedule          | 7 noise levels decaying geometrically,<br>$\sigma_0 = 0.2154, \dots, \sigma_6 = 0.01$ .                                                                                   |
|                        | Step size                   | $\epsilon = 5 \cdot 10^{-6}$                                                                                                                                              |
|                        | Steps per noise level       | $T = 20$                                                                                                                                                                  |
|                        | Denoising? [9]              | Yes                                                                                                                                                                       |
|                        | $\chi^2$ SoftPlus threshold | $\alpha = 1000$                                                                                                                                                           |

Table 4: Data and model details for the **USPS**  $\rightarrow$  **MNIST** qualitative experiment shown in Figure 3. For **MNIST**  $\rightarrow$  **USPS**, we use the same configuration with source and target datasets swapped.

| Problem Aspect         | Hyperparameters | Numbers and details                                                                                                                                                                           |
|------------------------|-----------------|-----------------------------------------------------------------------------------------------------------------------------------------------------------------------------------------------|
| Source                 | Dataset         | CelebA or Blur-CelebA [17]                                                                                                                                                                    |
|                        | Preprocessing   | 140 <sup>2</sup> px center crop.<br>If Blur-CelebA: nearest neighbor resize to 32 <sup>2</sup> px.<br>Nearest neighbor resize to 64 <sup>2</sup> px.<br>Horizontal flip with probability 0.5. |
| Target                 | Dataset         | CelebA [17]                                                                                                                                                                                   |
|                        | Preprocessing   | 140 <sup>2</sup> px center crop.<br>Nearest neighbor resize to 64 <sup>2</sup> px.<br>Horizontal flip with probability 0.5.                                                                   |
| Score Estimator        | Architecture    | NCSNv2 64 <sup>2</sup> px.                                                                                                                                                                    |
|                        | Loss            | Denoising Score Matching                                                                                                                                                                      |
|                        | Optimization    | Adam, lr = 10 <sup>-4</sup> , $\beta_1 = 0.9$ , $\beta_2 = 0.999$ .<br>Parameter EMA at rate 0.999.                                                                                           |
|                        | Training        | 210000 training iterations,<br>128 samples per minibatch.                                                                                                                                     |
| Compatibility          | Architecture    | ReLU network with ReLU output activation,<br>3 · 64 <sup>2</sup> → 2048 → ... → 2048 → 1 (8 hidden layers).                                                                                   |
|                        | Regularization  | Varies in $\chi^2$ reg., $\lambda \in \{0.1, 0.1, 0.001\}$ ,<br>and KL reg., $\lambda \in \{0.1, 0.01, 0.005\}$ .                                                                             |
|                        | Optimization    | Adam, lr = 10 <sup>-6</sup> , $\beta_1 = 0.9$ , $\beta_2 = 0.999$                                                                                                                             |
|                        | Training        | 5000 training iterations,<br>1000 samples per minibatch.                                                                                                                                      |
| Barycentric Projection | Architecture    | NCSNv2 64 <sup>2</sup> px applied as-is for image generation.                                                                                                                                 |
|                        | Optimization    | Adam, lr = 10 <sup>-7</sup> , $\beta_1 = 0.9$ , $\beta_2 = 0.999$                                                                                                                             |
|                        | Training        | 20000 training iterations,<br>64 samples per minibatch.                                                                                                                                       |

Table 5: Training details for the **CelebA, Blur-CelebA** → **CelebA** FID experiment (Figure 2).

| Problem                   | Noise ( $\sigma_1, \sigma_k$ ) | Step Size          | Steps     | Denoising? [9] | $\chi^2$ SoftPlus Param. |
|---------------------------|--------------------------------|--------------------|-----------|----------------|--------------------------|
| $\chi^2, \lambda = 0.1$   | (9, 0.01)                      | $15 \cdot 10^{-7}$ | $k = 500$ | Yes            | $\alpha = 10$            |
| $\chi^2, \lambda = 0.01$  | —  —                           |                    |           |                |                          |
| $\chi^2, \lambda = 0.001$ | —  —                           |                    |           |                |                          |
| KL, $\lambda = 0.1$       | (90, 0.1)                      | $15 \cdot 10^{-7}$ | $k = 500$ | Yes            | —                        |
| KL, $\lambda = 0.01$      | —  —                           |                    |           |                |                          |
| KL, $\lambda = 0.005$     | (90, 0.1)                      | $1 \cdot 10^{-7}$  | $k = 500$ | Yes            | —                        |

Table 6: Sampling details for the **CelebA, Blur-CelebA** → **CelebA** FID experiment (Figure 2).

| Problem Aspect  | Hyperparameters    | Numbers and details                                                                                                                  |
|-----------------|--------------------|--------------------------------------------------------------------------------------------------------------------------------------|
| Source          | Dataset            | Gaussian in $\mathbb{R}^{784}$ ,<br>Mean and covariance are that of MNIST                                                            |
|                 | Preprocessing      | None                                                                                                                                 |
| Target          | Dataset            | Unit gaussian in $\mathbb{R}^{784}$ .                                                                                                |
|                 | Preprocessing      | None                                                                                                                                 |
| Score Estimator | Architecture       | None (score is given by closed form)                                                                                                 |
| Compatibility   | Architecture       | ReLU network with ReLU output activation,<br>$784 \rightarrow 2048 \rightarrow 2048 \rightarrow 2048 \rightarrow 2048 \rightarrow 1$ |
|                 | Regularization     | KL Regularization, $\lambda \in \{1, 0.5, 0.25\}$ .                                                                                  |
|                 | Optimization       | Adam, $\text{lr} = 10^{-6}$ , $\beta_1 = 0.9$ , $\beta_2 = 0.999$                                                                    |
|                 | Training           | 5000 training iterations,<br>1000 samples per minibatch.                                                                             |
| Sampling        | Annealing Schedule | No annealing.                                                                                                                        |
|                 | Step size          | $\epsilon = 5 \cdot 10^{-3}$                                                                                                         |
|                 | Mixing steps       | $T = 1000$                                                                                                                           |
|                 | Denoising? [9]     | Not applicable.                                                                                                                      |

Table 7: Sampling and model details for the synthetic experiment shown in Figure 2
